# Supplementary material
Source: PubMed Central journal article supplement (PMC10052906)
Supplement: jammi-2022-0027_supplement1.pdf [file jammi-2022-0027_supplement1.pdf]

## SUPPLEMENTARY MATERIAL

**Table S1:** Basic demographic and clinical characteristics of different patients (first episode only)

|                                     | Overall (n = 233) | Fluconazole (n = 83) | Posaconazole (n = 150) | p-value      |
|-------------------------------------|-------------------|----------------------|------------------------|--------------|
| Age, mean ± SD                      | 49.7 ± 13.6       | 47.7 ± 14.1          | 50.8 ± 13.2            | 0.097        |
| Age > 50 years, n (%)               | 128 (54.9)        | 39 (47.0)            | 89 (59.3)              | 0.075        |
| Female, n (%)                       | 102 (43.8)        | 36 (43.4)            | 66 (44.0)              | 1.000        |
| AML/MDS, n (%)                      | 203 (87.1)        | 66 (79.5)            | 137 (91.3)             | <b>0.014</b> |
| First induction, n (%)              | 203 (87.1)        | 80 (96.4)            | 123 (82.0)             | <b>0.002</b> |
| Previous HSCT, n (%)                | 22 (9.4)          | 4 (4.8)              | 18 (12.0)              | 0.100        |
| Neutropenia <500* (days), mean ± SD | 18.7 ± 8.6        | 19.0 ± 10.1          | 18.6 ± 7.7             | 0.738        |
| Neutropenia <100* (days), mean ± SD | 10.1 ± 5.6        | 8.6 ± 5.3            | 10.9 ± 5.6             | <b>0.003</b> |
| Follow-up (days), mean ± SD         | 47.5 ± 26.1       | 48.0 ± 26.8          | 47.3 ± 25.7            | 0.848        |

Statistically significant values (<0.05) are shown in bold

\* Absolute neutrophil count (cells/μL)

SD = Standard deviation; AML = Acute myelogenous leukemia; MDS = Myelodysplastic syndrome

**Table S2:** IFI incidence among first episodes (n = 233), according to galactomannan criteria

| Galactomannan criteria      | Proven/probable IFI cases |                               |                                 | p-value* |
|-----------------------------|---------------------------|-------------------------------|---------------------------------|----------|
|                             | Total                     | Fluconazole Group, n = 83 (%) | Posaconazole Group, n = 150 (%) |          |
| Galactomannan ≥ 0.5         | 17                        | 12 (16.9)                     | 5 (3.4)                         | 0.003    |
| Galactomannan 2020 criteria | 15                        | 11 (13.3)                     | 4 (2.7)                         | 0.004    |

\* Fisher's exact test

IFI = Invasive fungal infection
